# Supplementary material for: Pharmacokinetic Changes According to Single or Multiple Oral Administrations of Socheongryong-Tang to Rats: Presented as a Typical Example of Changes in the Pharmacokinetics Following Multiple Exposures to Herbal Medicines
Source: MDPI journal article supplement (doi:10.3390/pharmaceutics13040478), 2021-04-01
Supplement: s1 [file s1]

# Supplementary Materials: Pharmacokinetic Changes According to Single or Multiple Oral Administrations of Socheongryong-tang to rats: Presented as a Typical Example of Changes in the Pharmacokinetics Following Multiple Exposures to Herbal Medicines

Seung-Hyun Jeong, Ji-Hun Jang, Da-Hwa Jung, Guk-Yeo Lee and Yong-Bok Lee

**Citation:** Jeong, S.-H.; Jang, J.-H.; Jung, D.-H.; Lee, G.-Y.; Lee, Y.-B. Pharmacokinetic Changes According to Single or Multiple Oral Administrations of Socheongryong-tang to rats: Presented as a Typical Example of Changes in the Pharmacokinetics Following Multiple Exposures to Herbal Medicines. *Pharmaceutics* **2021**, *13*, 487. <https://doi.org/10.3390/pharmaceutics13040478>

Academic Editor: Kishor M. Wasan

Received: 11 March 2021

Accepted: 29 March 2021

Published: 1 April 2021

**Publisher's Note:** MDPI stays neutral with regard to jurisdictional claims in published maps and institutional affiliations.

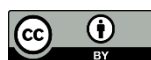

**Copyright:** © 2021 by the authors. Submitted for possible open access publication under the terms and conditions of the Creative Commons Attribution (CC BY) license (<http://creativecommons.org/licenses/by/4.0/>).

**Table S1.** Summary of UHPLC-MS/MS method validation items.

| Validation item             | Description                                                                                                                                                                                                                                                                                                                                                                                                                                                                                                                                                                                                                                                                                                                                                                                                                                                                                                                                                                                                                                                                                                                                                                    |
|-----------------------------|--------------------------------------------------------------------------------------------------------------------------------------------------------------------------------------------------------------------------------------------------------------------------------------------------------------------------------------------------------------------------------------------------------------------------------------------------------------------------------------------------------------------------------------------------------------------------------------------------------------------------------------------------------------------------------------------------------------------------------------------------------------------------------------------------------------------------------------------------------------------------------------------------------------------------------------------------------------------------------------------------------------------------------------------------------------------------------------------------------------------------------------------------------------------------------|
| Selectivity and sensitivity | Selectivity was investigated to confirm the influence of endogenous compounds located in the closed retention times for the analytes. Blank plasma from healthy and drug-free rats; $n \geq 6$ ; plasma spiked with the IS (as zero); and plasma samples obtained after the oral administration of 120 mg/kg of Socheongryong-tang (SCRT) to rats were used to determine selectivity. The sensitivity of the method was expressed as the lower limit of quantitation (LLOQ) determined as the lowest concentration of the standard samples with a signal-to-noise ratio of at least 10:1, in accordance with an acceptable precision of less than 20% and an accuracy within $\pm 20\%$ , which were evaluated using five replicate samples.                                                                                                                                                                                                                                                                                                                                                                                                                                   |
| Linearity                   | Calibration curves were constructed by linear regression using 6–8 calibration points with a weighting factor of $1/\text{concentration}^2$ . Linearity was determined by plotting the analyte/IS peak area versus the theoretical analyte concentration, suggesting a linear calibration equation with its correlation coefficient ( $r^2$ ). The linearity of ephedrine, paeoniflorin, and cinnamic acid was estimated using a series of calibration standards in the range of 0.5–,000 ng/mL, 0.2–20 ng/mL, and 0.1–500 ng/mL, respectively, in rat plasma. A straight-line regression equation was obtained with an $r^2$ value of 0.99 or more.                                                                                                                                                                                                                                                                                                                                                                                                                                                                                                                           |
| Precision and accuracy      | Intra-batch precision and accuracy were determined by analyzing the QC samples (LLOQ = 0.5, 0.2, and 0.1 ng/mL for ephedrine, paeoniflorin, and cinnamic acid, respectively; low concentrations = 1, 0.6, and 0.3 ng/mL for ephedrine, paeoniflorin, and cinnamic acid, respectively; medium concentrations = 500, 10, and 250 ng/mL for ephedrine, paeoniflorin, and cinnamic acid; and high concentrations = 800, 16, and 400 ng/mL for ephedrine, paeoniflorin, and cinnamic acid, respectively) at five different times on the same day. Inter-batch assessments were similarly carried out on five consecutive days. The concentration of each QC sample was evaluated using freshly prepared calibration standards, and the precision was determined by calculating the coefficient of variation (CV) in the analysis of the QC samples. The precision CV for each concentration level should not deviate by more than $\pm 15\%$ except for the LLOQ with a limit of 20%. The accuracy was evaluated based on the criterion of a mean no greater than 15% of the nominal concentration except for the LLOQ, which should not exceed 20%.                                |
| Recovery and matrix effect  | The recovery of ephedrine, paeoniflorin, and cinnamic acid were evaluated for the QC samples at low, medium, and high concentrations in five replicates. The extraction recoveries for the three analytes from rat plasma were assessed by comparing the detector (MS/MS) response for the extracted samples (A) to those of the samples added at the same concentration after extracting the blank plasma (B). Recovery of the ISs was evaluated at working concentrations of 10 ng/mL for geniposide and 4 ng/mL for diphenhydramine in the same manner. Additionally, the matrix effect was evaluated by comparing the peak area of the analyte post-extraction (B) in blank plasma with the absolute standard (C) of the same. The recovery and matrix effect were calculated as follows: $\text{Recovery} = \frac{A}{B} \times 100\%$ ; $\text{Matrix effect} = \frac{B}{C} \times 100\%$ . The recovery did not need to be 100%, but the value should have been consistent, precise, and reproducible. Additionally, a matrix effect of 100% indicated that the matrix components had little effect on the quantification of ephedrine, paeoniflorin, and cinnamic acid. |
| Stability                   | Studies were designed to evaluate the stability of ephedrine, paeoniflorin, and cinnamic acid in rat plasma samples under various storage and process conditions of short-term and long-term storage, freeze-thaw, and autosampler (post-preparative) conditions. Two concentrations of QC samples were examined in all stability tests: low: 1, 0.6, and 0.3 ng/mL for ephedrine, paeoniflorin, and cinnamic acid, respectively; and high: 800, 16, and 400 ng/mL for ephedrine, paeoniflorin, and cinnamic acid, respectively. Short-term stability was tested by maintaining the QC samples at room temperature (25 °C) for 4 or 24 h, and long-term stability was measured by analyzing QC samples that were frozen at -80 °C for 1–8 weeks. For the freeze-and-thaw stability test, the QC samples were stored at -80 °C for 24 h and then thawed completely at 25 °C. This cycle was repeated, and the analysis was performed after the first or third cycle. In addition, the QC samples were placed in the autosampler at 15 °C for 24 h to test the post-preparative stability. The stability of the stock                                                            |

---

|                    |                                                                                                                                                                                                                                                                                                                                                                                                                                                                                                                                                                                                                           |
|--------------------|---------------------------------------------------------------------------------------------------------------------------------------------------------------------------------------------------------------------------------------------------------------------------------------------------------------------------------------------------------------------------------------------------------------------------------------------------------------------------------------------------------------------------------------------------------------------------------------------------------------------------|
|                    | <p>solutions of ephedrine, paeoniflorin, cinnamic acid, and IS was assessed by measuring the analyte concentrations after storage at -20 °C for eight weeks. The samples were considered stable if the mean peak area at each level was within <math>\pm 15\%</math> of the sample nominal concentration and the precision was less than 15% (<math>n = 5</math>).</p>                                                                                                                                                                                                                                                    |
| Carryover          | <p>Carryover was tested to determine whether the analytes or the IS remaining in the analytical instrument would affect the analysis and quantification of subsequent sample measurements. The carryover was tested by injecting a blank sample after injecting the maximum concentration sample of each analyte (1,000, 20, and 500 ng/mL for ephedrine, paeoniflorin, and cinnamic acid; 10 and 20 ng/mL for IS). In this blank sample, each analyte peak should have been less than 20% of the LLOQ peak.</p>                                                                                                          |
| Dilution integrity | <p>Dilution integrity was tested to confirm that dilutions (when the concentration of the sample exceeded the maximum quantitative limit of 1,000, 20, or 500 ng/mL in ephedrine, paeoniflorin, and cinnamic acid, respectively) made by adding the same biological matrix did not affect the analysis. Specifically, a sample that exceeded 1,000 or 20 or 500 ng/mL in ephedrine, paeoniflorin, and cinnamic acid was diluted with a biological matrix and analyzed five times for each dilution factor, and whether the concentration of the diluted sample was within the calibration curve range was determined.</p> |

---

**Table S2.** Summary of test results under several conditions performed for the optimal separation of ephedrine, paeoniflorin, and cinnamic acid.

| Compound      | Mobile phase test                                                                                                                                                                                                                                                                                                                                                                                             | Column test                                                                                                                                                                                                                                                                                                                        | Sample preparation test                                                                                                                                                                                                                                                                                                                                                                                                                                                                                      |
|---------------|---------------------------------------------------------------------------------------------------------------------------------------------------------------------------------------------------------------------------------------------------------------------------------------------------------------------------------------------------------------------------------------------------------------|------------------------------------------------------------------------------------------------------------------------------------------------------------------------------------------------------------------------------------------------------------------------------------------------------------------------------------|--------------------------------------------------------------------------------------------------------------------------------------------------------------------------------------------------------------------------------------------------------------------------------------------------------------------------------------------------------------------------------------------------------------------------------------------------------------------------------------------------------------|
| Ephedrine     | <p>The addition of 0.1% (<i>v/v</i>) formic acid to mobile phase A increased peak intensity compared to 0.05% (<i>v/v</i>) formic acid.</p> <p>When 100% methanol was used as mobile phase B, the peak sensitivity of the analyte was increased and the noise was reduced compared to 100% acetonitrile.</p>                                                                                                  | <p>Peak cleavage was not observed when analyzing ephedrine with the HALO-C<sub>18</sub> column.</p> <p>There was no overlap of the IS and analyte peak retention times.</p>                                                                                                                                                        | <p>For ephedrine, the detection sensitivity was excellent in this condition and sample preparation (using methanol) was possible without decompression with centrifugal evaporation using nitrogen.</p>                                                                                                                                                                                                                                                                                                      |
| Paeoniflorin  | <p>The addition of 0.1% (<i>v/v</i>) formic acid to mobile phase A resulted in increased peak intensity compared to 0.05% (<i>v/v</i>) formic acid.</p> <p>Using 100% acetonitrile as mobile phase B increased the peak sensitivity and elution of the analyte.</p>                                                                                                                                           | <p>The sensitivity of paeoniflorin using the Phenomenex Kinetex core-shell biphenyl column was very high. Peak symmetry was also excellent and there was no tailing phenomenon.</p>                                                                                                                                                | <p>The methanol-based protein precipitation method showed less noise and superior sensitivity compared to the liquid-liquid extraction (using ethyl-acetate or ether) method.</p> <p>The effect was better using methanol compared to acetonitrile as the protein precipitation method.</p>                                                                                                                                                                                                                  |
| Cinnamic acid | <p>The mobile phase condition of acetonitrile and water containing 2 mM ammonium acetate or 100% water was attempted. However, these results were unsatisfactory for cinnamic acid analysis due to unsuitable resolution and low sensitivity.</p> <p>Formic acid in water (0.005% (<i>v/v</i>)) as mobile phase A and acetonitrile as mobile phase B displayed the highest intensity and best resolution.</p> | <p>HALO-C<sub>18</sub>, Inertsil-C<sub>8</sub>, UPLC® BEH C<sub>18</sub>, and Phenomenex Kinetex core-shell biphenyl columns were tested to obtain an optimum chromatogram.</p> <p>The HALO-C<sub>18</sub> column was more suitable than the others for analyzing cinnamic acid. Peak sensitivity and symmetry were excellent.</p> | <p>For cinnamic acid, ethyl acetate extracted the largest amount compared to methyl-<i>t</i>-butyl ether, methylene chloride, and di-ethyl ether.</p> <p>Acetic acid was added to the extraction solvents to suppress the ionization of cinnamic acid and then to increase the transfer of cinnamic acid to the organic solvent layer. The best extraction efficiency was obtained when a mixed organic solvent of methanol and ethyl acetate with added acetic acid was used as the extraction solvent.</p> |

**Table S3.** Precision and accuracy of UHPLC-MS/MS analysis for the determination of ephedrine, paeoniflorin, and cinnamic acid in rat plasma (mean  $\pm$  SD,  $n = 5$ ).

| Spiked Conc.<br>(ng/mL) | Intra-Batch ( $n = 5$ )                  |                      |                 | Inter-batch ( $n = 5$ )                  |                      |                 |
|-------------------------|------------------------------------------|----------------------|-----------------|------------------------------------------|----------------------|-----------------|
|                         | Measured Conc.<br>(ng/mL, mean $\pm$ SD) | Precision<br>(CV, %) | Accuracy<br>(%) | Measured Conc.<br>(ng/mL, mean $\pm$ SD) | Precision<br>(CV, %) | Accuracy<br>(%) |
| <b>Ephedrine</b>        |                                          |                      |                 |                                          |                      |                 |
| 0.5                     | 0.49 $\pm$ 0.01                          | 2.27                 | 98.77           | 0.51 $\pm$ 0.02                          | 5.56                 | 103.22          |
| 1                       | 1.04 $\pm$ 0.02                          | 1.66                 | 102.11          | 1.02 $\pm$ 0.03                          | 2.86                 | 101.43          |
| 500                     | 487.50 $\pm$ 14.69                       | 2.90                 | 96.13           | 487.59 $\pm$ 11.25                       | 2.20                 | 95.81           |
| 800                     | 747.03 $\pm$ 10.10                       | 1.25                 | 92.00           | 739.00 $\pm$ 14.51                       | 2.40                 | 90.81           |
| <b>Paeoniflorin</b>     |                                          |                      |                 |                                          |                      |                 |
| 0.2                     | 0.23 $\pm$ 0.021                         | 9.19                 | 110.87          | 0.21 $\pm$ 0.010                         | 5.04                 | 101.60          |
| 0.6                     | 0.66 $\pm$ 0.030                         | 5.20                 | 104.67          | 0.58 $\pm$ 0.052                         | 8.21                 | 94.57           |
| 10                      | 11.22 $\pm$ 0.43                         | 3.67                 | 106.87          | 10.17 $\pm$ 0.56                         | 5.49                 | 99.93           |
| 16                      | 17.43 $\pm$ 1.541                        | 8.83                 | 103.77          | 16.04 $\pm$ 0.844                        | 5.26                 | 98.63           |
| <b>Cinnamic acid</b>    |                                          |                      |                 |                                          |                      |                 |
| 0.1                     | 0.10 $\pm$ 0.00                          | 1.96                 | 102.00          | 0.10 $\pm$ 0.00                          | 3.88                 | 98.75           |
| 0.3                     | 0.30 $\pm$ 0.01                          | 4.13                 | 101.70          | 0.29 $\pm$ 0.01                          | 3.64                 | 95.60           |
| 250                     | 240.16 $\pm$ 6.69                        | 2.57                 | 96.07           | 266.72 $\pm$ 7.75                        | 2.90                 | 106.69          |
| 400                     | 425.40 $\pm$ 9.43                        | 2.22                 | 106.35          | 414.63 $\pm$ 11.38                       | 2.75                 | 103.66          |

**Table S4.** Recovery and matrix effect for the determination of ephedrine, paeoniflorin, and cinnamic acid in rat plasma (mean  $\pm$  SD,  $n = 5$ ).

| Spiked Conc. (ng/mL) | Recovery (%)     | Matrix effect (%) |
|----------------------|------------------|-------------------|
| <b>Ephedrine</b>     |                  |                   |
| 1                    | 73.93 $\pm$ 4.27 | 98.26 $\pm$ 1.77  |
| 500                  | 74.28 $\pm$ 4.85 | 100.24 $\pm$ 1.80 |
| 800                  | 76.49 $\pm$ 4.11 | 95.96 $\pm$ 3.46  |
| <b>Paeoniflorin</b>  |                  |                   |
| 0.6                  | 82.45 $\pm$ 5.88 | 100.44 $\pm$ 0.91 |
| 10                   | 84.29 $\pm$ 4.82 | 97.40 $\pm$ 3.23  |
| 16                   | 84.81 $\pm$ 5.21 | 99.93 $\pm$ 2.05  |
| <b>Cinnamic acid</b> |                  |                   |
| 0.3                  | 79.34 $\pm$ 3.71 | 99.08 $\pm$ 1.32  |
| 250                  | 77.18 $\pm$ 5.39 | 98.77 $\pm$ 3.06  |
| 400                  | 81.46 $\pm$ 4.88 | 101.29 $\pm$ 2.02 |

**Table S5.** Stability (%) of ephedrine, paeoniflorin, and cinnamic acid in rat plasma under various conditions (mean  $\pm$  SD,  $n = 5$ ).

| Spiked Conc. (ng/mL) | Short-term <sup>1</sup> (4 h, 25 °C) | Short-term <sup>2</sup> (24 h, 25 °C) | Long-term <sup>1</sup> (1 week, −80 °C) | Long-term <sup>2</sup> (4 weeks, −80 °C) | Long-term <sup>3</sup> (8 weeks, −80 °C) | Autosampler (24 h, 15 °C) | Freeze-thaw <sup>1</sup> (1 cycle, from −80 °C to 25 °C) | Freeze-thaw <sup>2</sup> (3 cycles, from −80 °C to 25 °C) |
|----------------------|--------------------------------------|---------------------------------------|-----------------------------------------|------------------------------------------|------------------------------------------|---------------------------|----------------------------------------------------------|-----------------------------------------------------------|
| <b>Ephedrine</b>     |                                      |                                       |                                         |                                          |                                          |                           |                                                          |                                                           |
| 1                    | 98.46 $\pm$ 4.32                     | 95.63 $\pm$ 3.03                      | 96.36 $\pm$ 3.02                        | 96.43 $\pm$ 5.32                         | 99.30 $\pm$ 1.48                         | 96.34 $\pm$ 3.53          | 93.33 $\pm$ 4.62                                         | 97.36 $\pm$ 2.53                                          |
| 800                  | 97.01 $\pm$ 6.81                     | 98.35 $\pm$ 1.55                      | 98.45 $\pm$ 4.35                        | 94.58 $\pm$ 6.12                         | 95.37 $\pm$ 2.12                         | 98.01 $\pm$ 4.99          | 96.21 $\pm$ 3.34                                         | 102.00 $\pm$ 6.92                                         |
| <b>Paeoniflorin</b>  |                                      |                                       |                                         |                                          |                                          |                           |                                                          |                                                           |
| 0.6                  | 95.54 $\pm$ 4.85                     | 97.46 $\pm$ 3.73                      | 93.68 $\pm$ 4.98                        | 94.06 $\pm$ 5.51                         | 95.66 $\pm$ 3.33                         | 96.47 $\pm$ 3.57          | 97.84 $\pm$ 2.17                                         | 100.26 $\pm$ 3.53                                         |
| 16                   | 96.83 $\pm$ 1.99                     | 95.97 $\pm$ 2.91                      | 98.74 $\pm$ 2.04                        | 99.63 $\pm$ 3.10                         | 93.72 $\pm$ 6.91                         | 96.81 $\pm$ 3.31          | 99.54 $\pm$ 1.93                                         | 102.52 $\pm$ 6.82                                         |
| <b>Cinnamic acid</b> |                                      |                                       |                                         |                                          |                                          |                           |                                                          |                                                           |
| 0.3                  | 100.35 $\pm$ 2.12                    | 99.18 $\pm$ 2.05                      | 99.87 $\pm$ 1.58                        | 101.76 $\pm$ 2.33                        | 97.98 $\pm$ 3.15                         | 98.59 $\pm$ 2.25          | 100.23 $\pm$ 1.96                                        | 98.89 $\pm$ 2.55                                          |
| 400                  | 99.43 $\pm$ 2.40                     | 100.56 $\pm$ 2.19                     | 100.21 $\pm$ 1.99                       | 98.34 $\pm$ 2.51                         | 102.01 $\pm$ 2.96                        | 98.80 $\pm$ 2.68          | 99.70 $\pm$ 2.51                                         | 100.36 $\pm$ 2.84                                         |

**Table S6.** Stability of stock and working solutions of ephedrine, paeoniflorin, and cinnamic acid at −20 °C for eight weeks (mean  $\pm$  SD,  $n = 5$ ).

| Compound             | Stock Solution        |                   | Working Solution      |                   |
|----------------------|-----------------------|-------------------|-----------------------|-------------------|
|                      | Concentration (mg/mL) | Stability (%)     | Concentration (ng/mL) | Stability (%)     |
| Ephedrine            | 1.00                  | 100.28 $\pm$ 4.32 | 5                     | 99.13 $\pm$ 1.44  |
|                      |                       |                   | 10,000                | 96.41 $\pm$ 3.59  |
| Paeoniflorin         | 1.00                  | 99.44 $\pm$ 2.47  | 2                     | 100.17 $\pm$ 1.16 |
|                      |                       |                   | 200                   | 98.26 $\pm$ 2.48  |
| Cinnamic acid        | 1.00                  | 97.18 $\pm$ 2.92  | 1                     | 97.49 $\pm$ 2.83  |
|                      |                       |                   | 5,000                 | 98.45 $\pm$ 3.47  |
| Diphenhydramine (IS) | 1.00                  | 98.52 $\pm$ 4.06  | 100                   | 97.15 $\pm$ 4.24  |
| Geniposide (IS)      | 1.00                  | 100.39 $\pm$ 2.48 | 100                   | 98.38 $\pm$ 2.26  |

IS meant internal standard.

**Table S7.** Summary of previously reported pharmacokinetic parameter results for ephedrine, paeoniflorin, and cinnamic acid after the single oral administration of various herbal medicines or internal standards.

| Analytes     | T <sub>max</sub> (h) | t <sub>1/2</sub> (h) | C <sub>max</sub> (ng/mL) | Dose (mg/kg)   | Administration Route | Dosage Form                                    | Reference              |
|--------------|----------------------|----------------------|--------------------------|----------------|----------------------|------------------------------------------------|------------------------|
| Ephedrine    | 1.0                  | 2.59 ± 0.79          | 1661.92 ± 86.23          | — <sup>a</sup> | Oral                 | Mahuang decoction                              | Wan et al., 2020 [1]   |
|              | 1.0                  | 1.68 ± 0.59          | 851.53 ± 40.74           | — <sup>a</sup> | Oral                 | Mahuang decoction                              | Wan et al., 2020 [1]   |
|              | 1.0                  | 1.93 ± 0.33          | 485.80 ± 35.22           | — <sup>a</sup> | Oral                 | Mahuang decoction                              | Wan et al., 2020 [2]   |
|              | 0.75                 | 2.17 ± 0.36          | 4150 ± 670               | 20             | Oral                 | Ephedra decoction                              | Tang et al., 2017 [2]  |
|              | 1.75 ± 0.45          | 4.12 ± 0.96          | 417 ± 51.1               | 31.1           | Oral                 | Maxingshiga-tang                               | Wang et al., 2016 [3]  |
|              | 3.08 ± 0.61          | 2.22 ± 0.28          | 383 ± 36.8               | 31.1           | Oral                 | Ephedra extract                                | Wang et al., 2016 [3]  |
|              | 0.29 ± 0.04          | 1.57 ± 0.13          | 1290 ± 172               | 31.1           | Oral                 | Standard ephedrine                             | Wang et al., 2016 [3]  |
|              | 1.67 ± 0.58          | 1.15 ± 0.32          | 46.85 ± 18.79            | 1.24           | Oral                 | Keke capsule originating from Maxingshiga-tang | Song et al., 2014 [4]  |
|              | 0.33 ± 0.20          | 9.76 ± 5.56          | 1180.44 ± 329.50         | — <sup>a</sup> | Oral                 | Mahuang aqueous extracts                       | Wei et al., 2014 [5]   |
| Paeoniflorin | 0.92-1.33            | 1.00-2.49            | 1547.55-2556.87          | — <sup>a</sup> | Oral                 | Mahuang-Guizhi herb-pair aqueous extracts      | Wei et al., 2014 [5]   |
|              | 2.70 ± 0.27          | 1.45 ± 0.22          | 340 ± 50                 | 100            | Oral                 | Standard paeoniflorin                          | Wang et al., 2016 [6]  |
|              | 0.37 ± 0.13          | 5.65 ± 1.06          | 5686.12 ± 1496.20        | 119.8          | Oral                 | Cerebralcare granule                           | Wang et al., 2013 [7]  |
|              | 0.36-0.44            | 4.51-5.26            | 743.83-12830             | — <sup>a</sup> | Oral                 | Shaoyao-Gancao decoction                       | Xu et al., 2013 [8]    |
|              | 0.08 ± 0.00          | 4.24 ± 0.88          | 7350 ± 2980              | 7000           | Oral                 | Radix Paeoniae Rubra decoction                 | Jiang et al., 2012 [9] |
|              | 0.44 ± 0.21          | 4.51 ± 1.04          | 8010 ± 2190              | 14000          | Oral                 | Radix Paeoniae Rubra decoction                 | Jiang et al., 2012 [9] |

|               |             |             |                |                |      |                                       |                          |
|---------------|-------------|-------------|----------------|----------------|------|---------------------------------------|--------------------------|
|               | 0.53–0.74   | 1.87–2.21   | 360–470        | 80             | Oral | Samul-tang                            | Hwang et al., 2012 [10]  |
|               | 0.5         | 2.22 ± 0.39 | 1550 ± 12      | 182.7          | Oral | <i>Paeoniae Radix</i> decoction       | Gan et al., 2012 [11]    |
|               | 0.5         | 2.32 ± 0.40 | 1414 ± 9       | 165.7          | Oral | Shaoyao-Gancao-tang                   | Gan et al., 2012 [11]    |
|               | 0.50 ± 0.00 | 6.94 ± 1.22 | 2240 ± 310     | 224.4          | Oral | Standard paeoniflorin                 | Liu et al., 2011 [12]    |
|               | 0.37 ± 0.08 | 5.95 ± 1.53 | 5150 ± 2100    | 224.4          | Oral | Danggui-Shaoyao-San                   | Liu et al., 2011 [12]    |
|               | 0.67 ± 0.07 | 1.86 ± 0.27 | 185.24 ± 26.24 | — <sup>a</sup> | Oral | <i>Radix Paeoniae Rubra</i> decoction | Feng et al., 2010 [13]   |
|               | 0.33 ± 0.02 | 0.85 ± 0.11 | 34.44 ± 13.42  | — <sup>a</sup> | Oral | <i>Radix Paeoniae Alba</i> decoction  | Feng et al., 2010 [13]   |
|               | 0.75        | 1.19 ± 0.33 | 570 ± 50       | 30             | Oral | Standard paeoniflorin                 | Wu et al., 2009 [14]     |
|               | 0.30 ± 0.11 | 1.67 ± 0.35 | 410 ± 50       | 30             | Oral | <i>Cortex Moutan</i> extract          | Wu et al., 2009 [14]     |
|               | 2.50        | 1.78 ± 0.32 | 380 ± 90       | 30             | Oral | <i>Shuang-Dan</i> decoction           | Wu et al., 2009 [14]     |
|               | 0.58 ± 0.34 | 4.27 ± 1.57 | 3340 ± 1180    | 300            | Oral | Standard paeoniflorin                 | Wang et al., 2008 [15]   |
|               | 1.67 ± 0.43 | 6.19 ± 2.06 | 3690 ± 1460    | 300            | Oral | <i>Radix Paeoniae Rubra</i> decoction | Wang et al., 2008 [15]   |
|               | 0.80 ± 0.35 | 3.58 ± 0.61 | 1460 ± 290     | 300            | Oral | <i>Radix Paeoniae Alba</i> decoction  | Wang et al., 2008 [15]   |
|               | 0.75 ± 0.08 | 0.92 ± 0.42 | 1260 ± 230     | 150            | Oral | Standard paeoniflorin                 | Liu et al., 2005 [16]    |
|               | 0.15 ± 0.01 | 0.83 ± 0.17 | 9.8 ± 2.1      | 0.5            | Oral | Standard paeoniflorin                 | Takeda et al., 1995 [17] |
|               | 0.16 ± 0.04 | 1.34 ± 0.39 | 30.7 ± 2.4     | 2.0            | Oral | Standard paeoniflorin                 | Takeda et al., 1995 [17] |
|               | 0.17 ± 0.04 | 0.52 ± 0.08 | 101.5 ± 18.6   | 5.0            | Oral | Standard paeoniflorin                 | Takeda et al., 1995 [17] |
| Cinnamic acid | 1.0         | 1.90–3.24   | 342.51–448.44  | — <sup>a</sup> | Oral | <i>Mahuang</i> decoction              | Wan et al., 2020 [1]     |



|                  |                 |                     |          |      |                                                 |                        |
|------------------|-----------------|---------------------|----------|------|-------------------------------------------------|------------------------|
| $0.08 \pm 0.00$  | $2.86 \pm 0.72$ | $664.1 \pm 172.4$   | $\sim^a$ | Oral | Huangqi-Guizhi-Wuwu decoction                   | Guan et al., 2019 [18] |
| $0.083 \pm 0.05$ | $2.45 \pm 0.46$ | $36.20 \pm 3.52$    | $\sim^a$ | Oral | Ling-Gui-Zhu-Gan decoction                      | Ji et al., 2018 [19]   |
| $0.3 \pm 0.2$    | $1.0 \pm 0.5$   | $5790 \pm 246$      | $\sim^a$ | Oral | <i>Cinnamoni Ramulus</i> extract                | Ji et al., 2015 [20]   |
| $0.13 \pm 0.05$  | $1.69 \pm 0.17$ | $1041.8 \pm 247.8$  | 7.2      | Oral | Guizhi-Fuling Capsule                           | Zhao et al., 2015 [21] |
| $0.5 \pm 0.00$   | $4.14 \pm 0.25$ | $1021.32 \pm 90.55$ | 10       | Oral | Standard cinnamic acid                          | Basu et al., 2013 [22] |
| $1.48 \pm 0.14$  | $2.5 \pm 0.9$   | $556.8 \pm 94.2$    | 37.2     | Oral | Xuanshen ( <i>Radix Scrophulariae</i> ) extract | Li et al., 2007 [23]   |
| $0.12 \pm 0.1$   | $0.33 \pm 0.1$  | $20742 \pm 14816$   | 11.29    | Oral | <i>Cinnamoni Ramulus</i> decoction              | Chen et al., 2009 [24] |

<sup>a</sup> means that the exact dosage for each ingredient was not presented in the reports. Only information on herbal medicinal herbs was presented, and accurate content information and dosages administered to the rats for each component were limited.

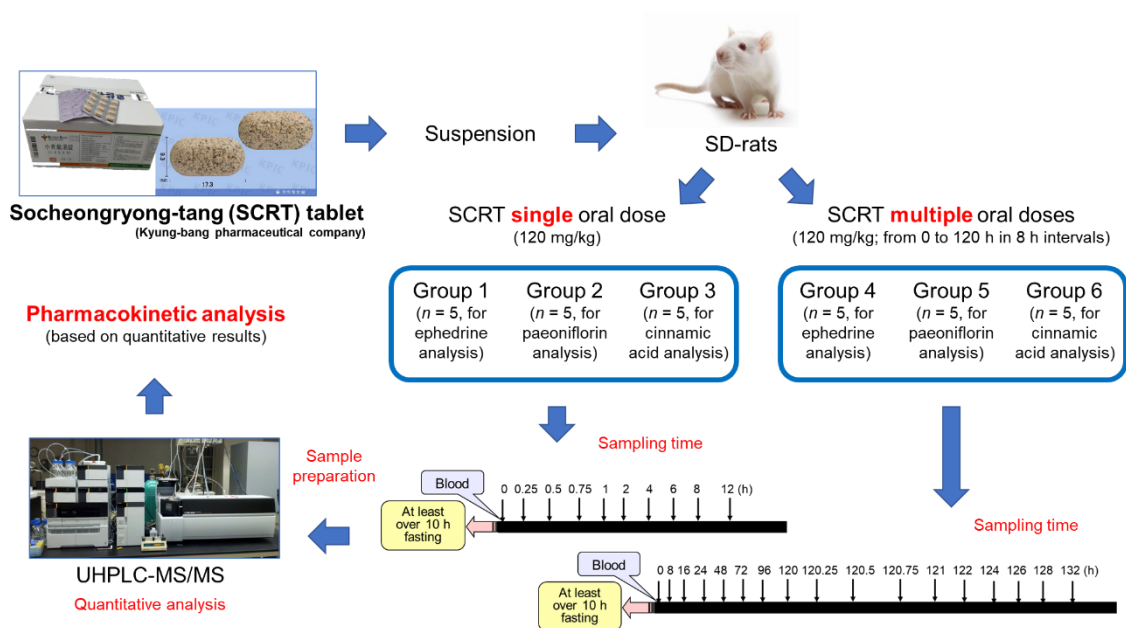

Figure S1. A schematic diagram summarizing the experimental design.

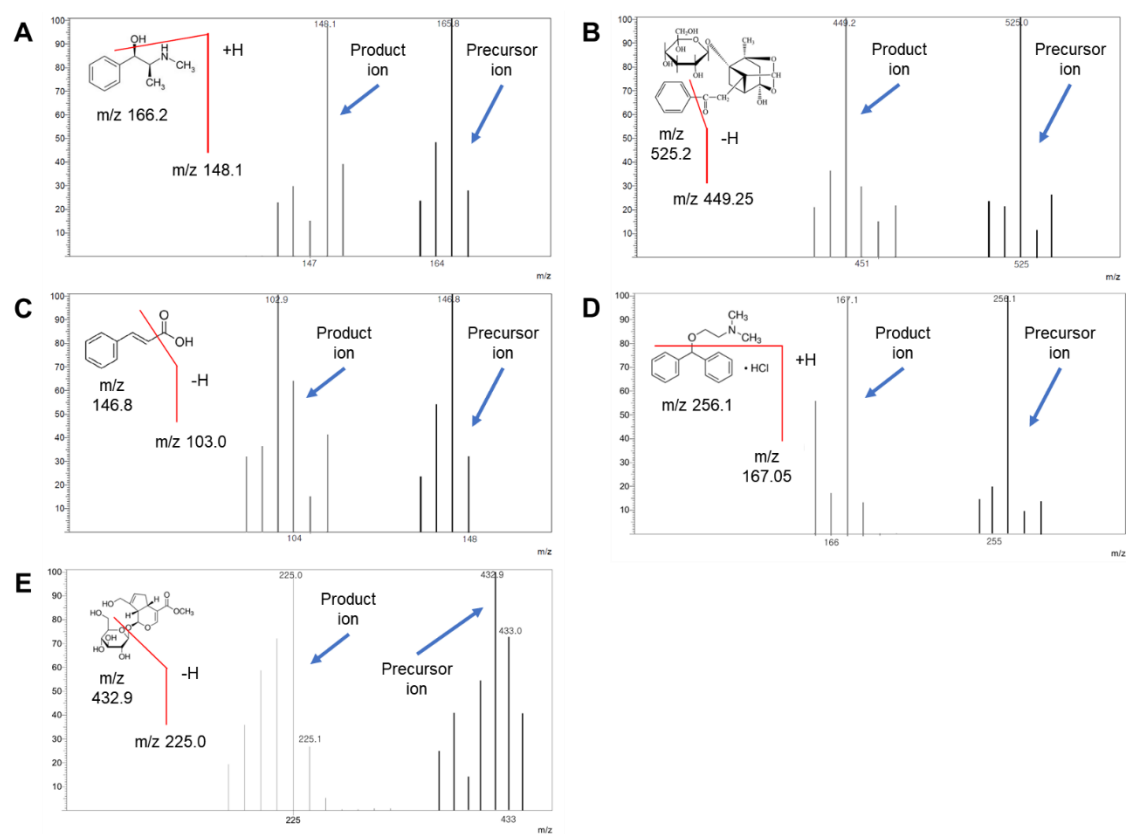

**Figure S2.** Precursor and product ion mass spectra of ephedrine (A), paeoniflorin (B), cinnamic acid (C), diphenhydramine (D), and geniposide (E) in the positive and negative ionization modes.

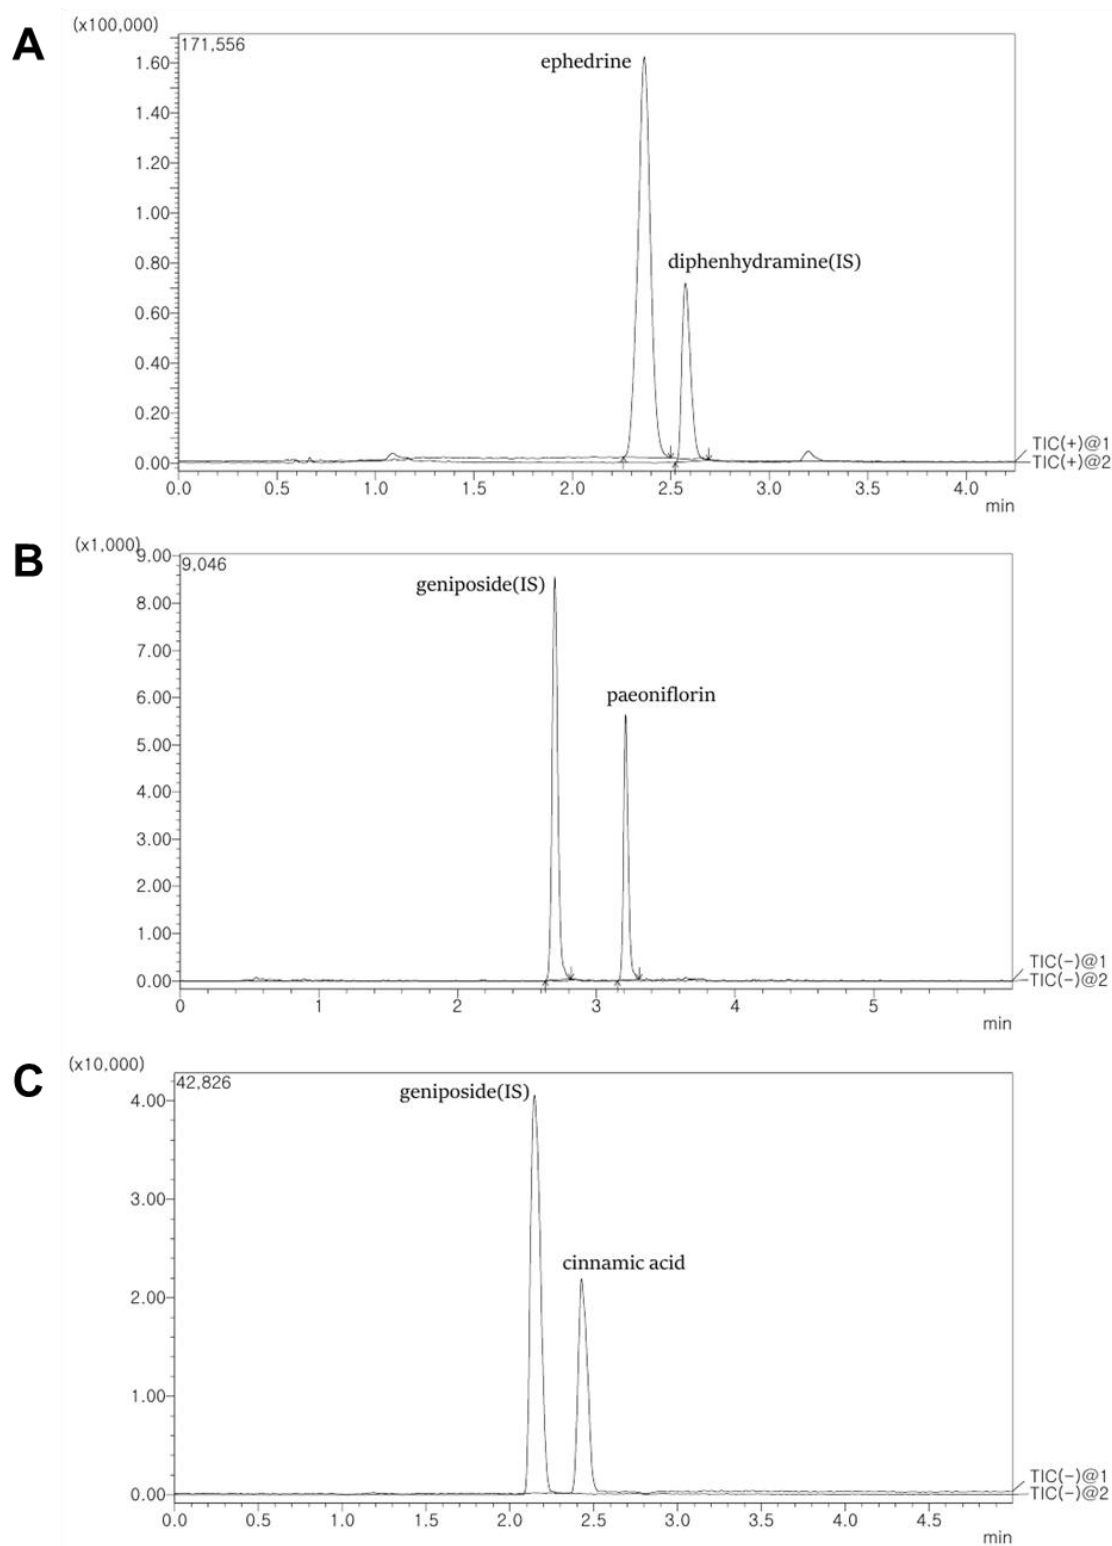

**Figure S3.** Representative MRM chromatograms of ephedrine (A), paeoniflorin (B), and cinnamic acid (C) with the IS.

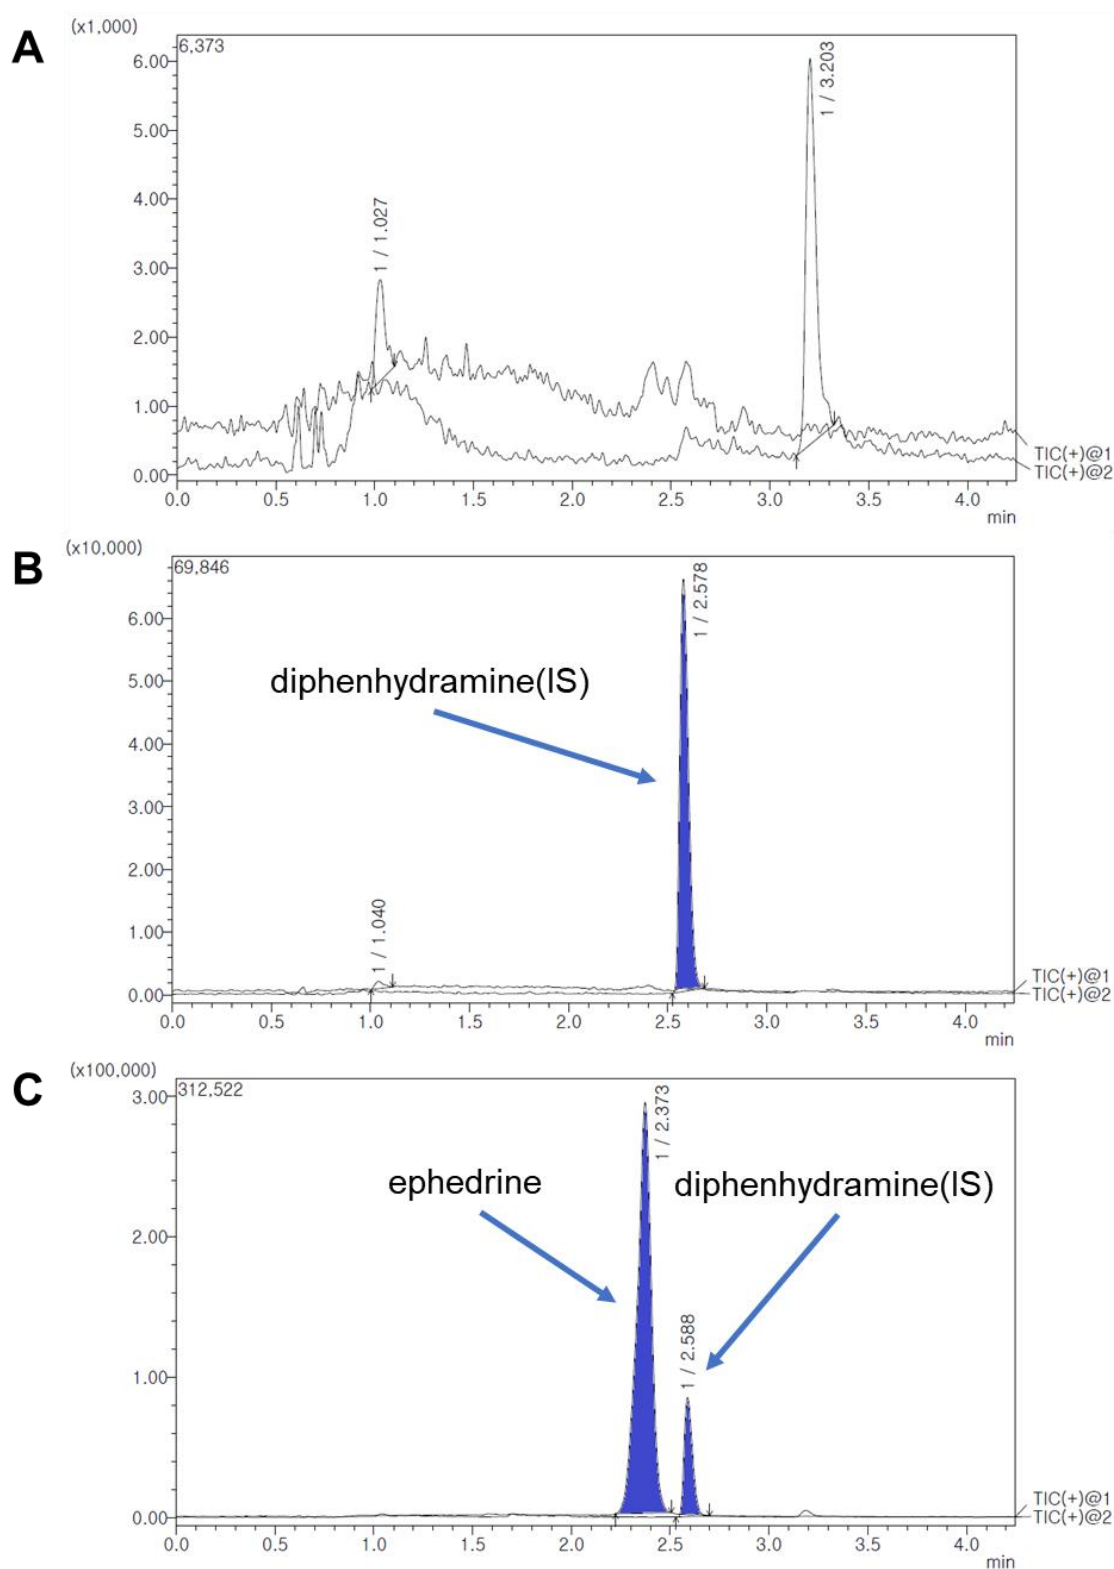

**Figure S4.** MRM chromatograms of ephedrine in blank plasma (A), zero plasma containing the IS (B), and a plasma sample at 0.75 h after the oral administration of a SCRT tablet (C).

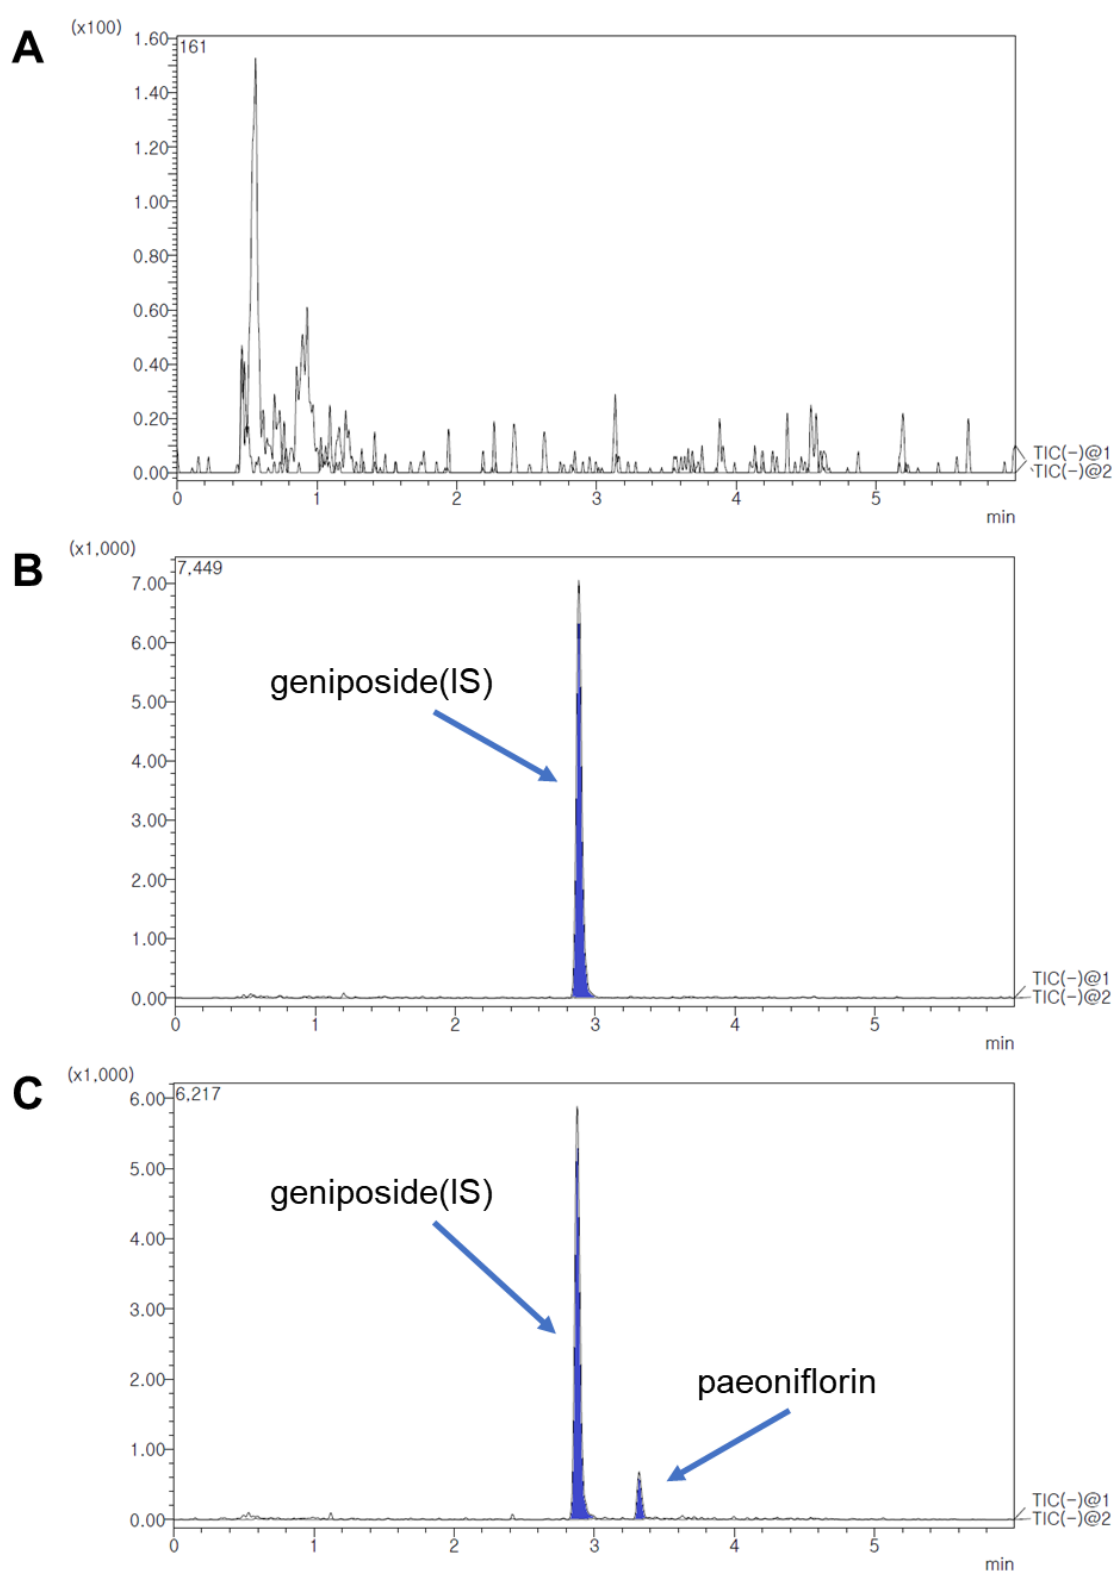

**Figure S5.** MRM chromatograms of paeoniflorin in blank plasma (A), zero plasma containing the IS (B), and a plasma sample at 0.75 h after the oral administration of a SCRT tablet (C).

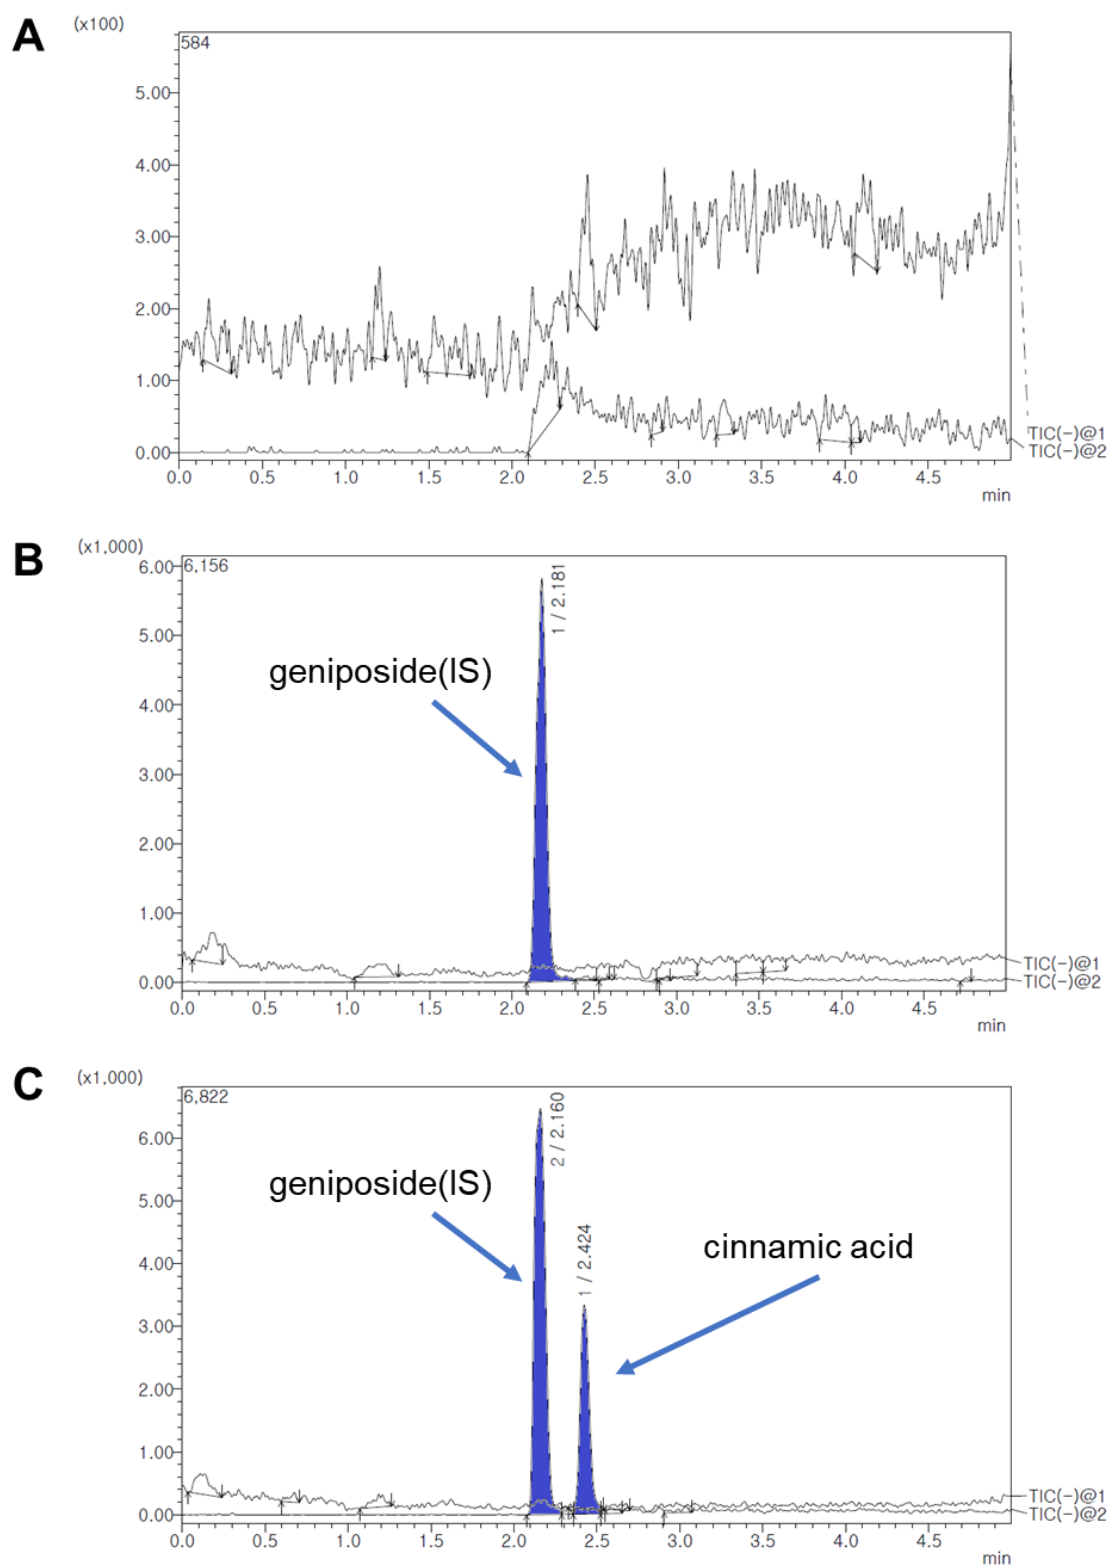

**Figure S6.** MRM chromatograms of cinnamic acid in blank plasma (A), zero plasma containing the IS (B), and a plasma sample at 0.75 h after the oral administration of a SCRT tablet (C).

#### References

1. Wan, H.; Pan, L.; Wang, Y.; Li, C.; Yu, L.; Zhou, H.; Wan, H.; He, Y. Pharmacokinetics of seven major active components of Mahuang decoction in rat blood and brain by LC-MS/MS coupled to microdialysis sampling. *Naunyn-Schmiedeberg's Arch. Pharmacol.* **2020**, *393*, 1559–1571.

2. Tang, Y.; Zheng, M.; Chen, Y.-L.; Chen, J.; He, Y. Pharmacokinetic effects of cinnamic acid, amygdalin, glycyrrhizic acid and liquiritin on ephedra alkaloids in rats. *Eur. J. Drug Metab. Pharmacokinet.* **2017**, *42*, 527–535.
3. Wang, J.-W.; Chiang, M.-H.; Lu, C.-M.; Tsai, T.-H. Determination the active compounds of herbal preparation by UHPLC–MS/MS and its application on the preclinical pharmacokinetics of pure ephedrine, single herbal extract of Ephedra, and a multiple herbal preparation in rats. *J. Chromatogr. B* **2016**, *1026*, 152–161.
4. Song, Y.; Su, D.; Lu, T.; Mao, C.; Ji, D.; Liu, Y.; Wei, B.; Fan, R. Differential pharmacokinetics and the brain distribution of morphine and ephedrine constitutional isomers in rats after oral administration with Keke capsule using rapid-resolution LC–MS/MS. *J. Sep. Sci.* **2014**, *37*, 352–359.
5. Wei, P.; Huo, H.-L.; Ma, Q.; Li, H.; Xing, X.; Tan, X.; Luo, J. Pharmacokinetic comparisons of five ephedrine alkaloids following oral administration of four different Mahuang–Guizhi herb-pair aqueous extracts ratios in rats. *J. Ethnopharmacol.* **2014**, *155*, 642–648.
6. Wang, C.; Yuan, J.; Zhang, L.L.; Wei, W. Pharmacokinetic comparisons of Paeoniflorin and Paeoniflorin-6'-O-benzene sulfonate in rats via different routes of administration. *Xenobiotica* **2016**, *46*, 1142–1150.
7. Wang, X.; Ma, X.; Li, W.; Chu, Y.; Guo, J.; Li, S.; Wang, J.; Zhang, H.; Zhou, S.; Zhu, Y. Simultaneous determination of five phenolic components and paeoniflorin in rat plasma by liquid chromatography–tandem mass spectrometry and pharmacokinetic study after oral administration of Cerebralcare granule®. *J. Pharm. Biomed. Anal.* **2013**, *86*, 82–91.
8. Xu, C.-H.; Wang, P.; Wang, Y.; Yang, Y.; Li, D.-H.; Li, H.-F.; Sun, S.-Q.; Wu, X.-Z. Pharmacokinetic comparisons of two different combinations of Shaoyao-Gancao Decoction in rats: Competing mechanisms between paeoniflorin and glycyrrhetic acid. *J. Ethnopharmacol.* **2013**, *149*, 443–452.
9. Jiang, F.; Zhao, Y.; Wang, J.; Wei, S.; Wei, Z.; Li, R.; Zhu, Y.; Sun, Z.; Xiao, X. Comparative pharmacokinetic study of paeoniflorin and albiflorin after oral administration of Radix Paeoniae Rubra in normal rats and the acute cholestasis hepatitis rats. *Fitoterapia* **2012**, *83*, 415–421.
10. Hwang, Y.-H.; Kim, T.; Cho, W.-K.; Jang, D.; Ha, J.-H.; Ma, J.Y. Food-and gender-dependent pharmacokinetics of paeoniflorin after oral administration with Samul-tang in rats. *J. Ethnopharmacol.* **2012**, *142*, 161–167.
11. Gan, P.; Zhong, M.; Huang, X.; Sun, M.; Wang, Y.; Xiao, Y.; Zeng, C.; Yuan, Q.; Liu, Z.; Zhou, H. Pharmacokinetic comparisons of albiflorin and paeoniflorin after oral administration of Shaoyao-Gancao-Tang and single herb Paeony decoction to rats. *Planta. Med.* **2012**, *78*, 237–243.
12. Liu, J.; Wang, J.-S.; Kong, L.-Y. Comparative pharmacokinetics of paeoniflorin in plasma of vascular dementia and normal rats orally administrated with Danggui-Shaoyao-San or pure paeoniflorin. *Fitoterapia* **2011**, *82*, 466–473.
13. Feng, C.; Liu, M.; Shi, X.; Yang, W.; Kong, D.; Duan, K.; Wang, Q. Pharmacokinetic properties of paeoniflorin, albiflorin and oxypaeoniflorin after oral gavage of extracts of Radix Paeoniae Rubra and Radix Paeoniae Alba in rats. *J. Ethnopharmacol.* **2010**, *130*, 407–413.
14. Wu, H.; Zhu, Z.; Zhang, G.; Zhao, L.; Zhang, H.; Zhu, D.; Chai, Y. Comparative pharmacokinetic study of paeoniflorin after oral administration of pure paeoniflorin, extract of Cortex Moutan and Shuang-Dan prescription to rats. *J. Ethnopharmacol.* **2009**, *125*, 444–449.
15. Wang, C.; Wang, R.; Cheng, X.; He, Y.; Wang, Z.; Wu, C.; Cao, J. Comparative pharmacokinetic study of paeoniflorin after oral administration of decoction of Radix Paeoniae Rubra and Radix Paeoniae Alba in rats. *J. Ethnopharmacol.* **2008**, *117*, 467–472.
16. Liu, Z.Q.; Zhou, H.; Liu, L.; Jiang, Z.H.; Wong, Y.F.; Xie, Y.; Cai, X.; Xu, H.X.; Chan, K. Influence of co-administrated sinomenine on pharmacokinetic fate of paeoniflorin in unrestrained conscious rats. *J. Ethnopharmacol.* **2005**, *99*, 61–67.
17. Takeda, S.; Isono, T.; Wakui, Y.; Matsuzaki, Y.; Sasaki, H.; Amagaya, S.; Maruno, M. Absorption and excretion of paeoniflorin in rats. *J. Pharm. Pharmacol.* **1995**, *47*, 1036–1040.
18. Guan, J.; Wang, L.; Jin, J.; Chang, S.; Xiao, X.; Feng, B.; Zhu, H. Simultaneous determination of calycosin-7-O-β-D-glucoside, cinnamic acid, paeoniflorin and albiflorin in rat plasma by UHPLC–MS/MS and its application to a pharmacokinetic study of Huangqi Guizhi Wuwu Decoction. *J. Pharm. Biomed. Anal.* **2019**, *170*, 1–7.
19. Ji, B.; Zhao, Y.; Yu, P.; Yang, B.; Zhou, C.; Yu, Z. LC-ESI-MS/MS method for simultaneous determination of eleven bioactive compounds in rat plasma after oral administration of Ling-Gui-Zhu-Gan Decoction and its application to a pharmacokinetics study. *Talanta* **2018**, *190*, 450–459.
20. Ji, B.; Zhao, Y.; Zhang, Q.; Wang, P.; Guan, J.; Rong, R.; Yu, Z. Simultaneous determination of cinnamaldehyde, cinnamic acid, and 2-methoxy cinnamic acid in rat whole blood after oral administration of volatile oil of Cinnamoni Ramulus by UHPLC–MS/MS: An application for a pharmacokinetic study. *J. Chromatogr. B* **2015**, *1001*, 107–113.
21. Zhao, L.; Xiong, Z.; Sui, Y.; Zhu, H.; Zhou, Z.; Wang, Z.; Zhao, Y.; Xiao, W.; Lin, J.; Bi, K. Simultaneous determination of six bioactive constituents of Guizhi Fuling Capsule in rat plasma by UHPLC–MS/MS: Application to a pharmacokinetic study. *J. Chromatogr. B* **2015**, *1001*, 49–57.
22. Basu, S.; Patel, V.B.; Jana, S.; Patel, H. Liquid chromatography tandem mass spectrometry method (LC–MS/MS) for simultaneous determination of piperine, cinnamic acid and gallic acid in rat plasma using a polarity switch technique. *Anal. Methods* **2013**, *5*, 967–976.
23. Li, P.; Zhang, Y.; Xiao, L.; Jin, X.; Yang, K. Simultaneous determination of harpagoside and cinnamic acid in rat plasma by high-performance liquid chromatography: Application to a pharmacokinetic study. *Anal. Bioanal. Chem.* **2007**, *389*, 2259–2264.
24. Chen, Y.; Ma, Y.; Ma, W. Pharmacokinetics and bioavailability of cinnamic acid after oral administration of Ramulus Cinnamomi in rats. *Eur. J. Drug Metab. Pharmacokinet.* **2009**, *34*, 51–56.
